# Supplementary material for: Dihydrolipoamide Acetyltransferase AceF Influences the Type III Secretion System and Resistance to Oxidative Stresses through RsmY/Z in Pseudomonas aeruginosa
Source: MDPI journal article supplement (doi:10.3390/microorganisms10030666), 2022-03-21
Supplement: s1 [file s1]

**Table S1.** The bacterial strains, plasmids and primers used in this study.

| Strain                           | Description                                                                                                                        | Source               |
|----------------------------------|------------------------------------------------------------------------------------------------------------------------------------|----------------------|
| PA14                             | Wild-type strain of <i>Pseudomonas aeruginosa</i>                                                                                  | [57]                 |
| $\Delta aceE$                    | PA14 deleted of <i>aceE</i>                                                                                                        | This study           |
| $\Delta aceF$                    | PA14 deleted of <i>aceF</i>                                                                                                        | This study           |
| $\Delta rsmYZ$                   | PA14 deleted of <i>rsmY</i> and <i>rsmZ</i>                                                                                        | This study           |
| $\Delta ahpB$                    | PA14 deleted of <i>ahpB</i>                                                                                                        | This study           |
| $\Delta katB$                    | PA14 deleted of <i>katB</i>                                                                                                        | This study           |
| $\Delta aceF \Delta rsmYZ$       | PA14 deleted of <i>aceF</i> , <i>rsmY</i> and <i>rsmZ</i>                                                                          | This study           |
| $\Delta aceF \Delta ahpB$        | PA14 deleted of <i>aceF</i> , <i>ahpB</i>                                                                                          | This study           |
| $\Delta aceF \Delta katB$        | PA14 deleted of <i>aceF</i> , <i>katB</i>                                                                                          | This study           |
| Plasmid                          |                                                                                                                                    |                      |
| pEX18Tc                          | Gene replacement vector; Tc <sup>r</sup>                                                                                           | [29]                 |
| pUCP20                           | <i>Escherichia-Pseudomonas</i> shuttle vector with a <i>lac</i> promoter; Amp <sup>r</sup>                                         | [58]                 |
| pDN19lacZ $\Omega$               | Promoterless <i>lacZ</i> fusion vector; Sp <sup>r</sup> , Sm <sup>r</sup> , Tc <sup>r</sup>                                        | [59]                 |
| pUCP20- <i>aceF</i>              | Overexpression of <i>aceF</i> gene on pUCP20; Amp <sup>r</sup>                                                                     | This study           |
| pUCP20- <i>exsA</i>              | Overexpression of <i>exsA</i> gene on pUCP20; Amp <sup>r</sup>                                                                     | [22]                 |
| <i>PrsmY</i> -pDN19lacZ $\Omega$ | <i>rsmY</i> gene promoter of PA14 on a promoterless <i>lacZ</i> fusion vector; Sp <sup>r</sup> , Sm <sup>r</sup> , Tc <sup>r</sup> | [60]                 |
| <i>PrsmZ</i> -pDN19lacZ $\Omega$ | <i>rsmZ</i> gene promoter of PA14 on a promoterless <i>lacZ</i> fusion vector; Sp <sup>r</sup> , Sm <sup>r</sup> , Tc <sup>r</sup> | [60]                 |
| pEX18Tc- $\Delta aceE$           | Upstream fragment and downstream fragment of the <i>aceE</i> gene on pEX18Tc for deletion <i>aceE</i> , Tc <sup>r</sup>            | This study           |
| pEX18Tc- $\Delta aceF$           | Upstream fragment and downstream fragment of the <i>aceF</i> gene on pEX18Tc for deletion <i>aceF</i> , Tc <sup>r</sup>            | This study           |
| pEX18Tc- $\Delta rsmY$           | Upstream fragment and downstream fragment of the <i>rsmY</i> gene on pEX18Tc for deletion <i>rsmY</i> , Tc <sup>r</sup>            | This study           |
| pEX18Tc- $\Delta rsmZ$           | Upstream fragment and downstream fragment of the <i>rsmZ</i> gene on pEX18Tc for deletion <i>rsmZ</i> , Tc <sup>r</sup>            | [59]                 |
| pEX18Tc- $\Delta ahpB$           | Upstream fragment and downstream fragment of the <i>ahpB</i> gene on pEX18Tc for deletion <i>ahpB</i> , Tc <sup>r</sup>            | This study           |
| pEX18Tc- $\Delta katB$           | Upstream fragment and downstream fragment of the <i>katB</i> gene on pEX18Tc for deletion <i>katB</i> , Tc <sup>r</sup>            | This study           |
| pEX18Tc- $\Delta exsA$           | Upstream fragment and downstream fragment of the <i>exsA</i> gene on pEX18Tc for deletion <i>exsA</i> , Tc <sup>r</sup>            | [59]                 |
| Primer                           | Sequence 5'–3'                                                                                                                     | Purpose              |
| EcoRI- <i>aceE</i> -up-F         | CGGAATCCCCCTGGTCCTGGTAGTACTG                                                                                                       | <i>aceE</i> deletion |
| BamHI- <i>aceE</i> -up-R         | CGGGATCCGACGGGATCGAGGTCTTGC                                                                                                        | <i>aceE</i> deletion |
| BamHI- <i>aceE</i> -down-F       | CGGGATCCATCCGACCTACGCCTACGAA                                                                                                       | <i>aceE</i> deletion |
| HindIII- <i>aceE</i> -down-R     | CCCAAGCTTCCTTGATCGAGACGCTTTCC                                                                                                      | <i>aceE</i> deletion |
| EcoRI- <i>aceF</i> -up-F         | CGGAATCCCCGACCTACGCCTACGAA                                                                                                         | <i>aceF</i> deletion |
| BamHI- <i>aceF</i> -up-R         | CGGGATCCGATGCTTTTCACTACCCCG                                                                                                        | <i>aceF</i> deletion |
| BamHI- <i>aceF</i> -down-F       | CGGGATCCTGGCGATCCTCGGTGTGTCC                                                                                                       | <i>aceF</i> deletion |
| HindIII- <i>aceF</i> -down-R     | CCCAAGCTTGGGCCAGGCGGACGATCA                                                                                                        | <i>aceF</i> deletion |

|                              |                                   |                      |
|------------------------------|-----------------------------------|----------------------|
| HindIII- <i>rsmY</i> -up-F   | CCCAAGCTTGTGCCGTTCTGCATCACCAT     | <i>rsmY</i> deletion |
| BamHI- <i>rsmY</i> -up-R     | CGGGATCCGCATCTCTGCGAGGGGGAG       | <i>rsmY</i> deletion |
| BamHI- <i>rsmY</i> -down-F   | CGGGATCCTCGCTGAGCGGTTTCCACA       | <i>rsmY</i> deletion |
| SmaI- <i>rsmY</i> -down-R    | TCCCCCGGGACCAATCCGCCCCAGGTTT      | <i>rsmY</i> deletion |
| HindIII- <i>rsmZ</i> -up-F   | GCCAACAAGCTTCACAACGCCACCGACAAGAG  | <i>rsmZ</i> deletion |
| KpnI- <i>rsmZ</i> -up-R      | ACCCCGGGTACCTTTTTTGCCTGCCGTTTAC   | <i>rsmZ</i> deletion |
| KpnI- <i>rsmZ</i> -down-F    | GTGTTTCGGTACCCGCAGGAGTGATATTAGCGA | <i>rsmZ</i> deletion |
| XbaI- <i>rsmZ</i> -down-R    | CTCAACTCTAGAGGTTTCTCGCCCCTGTTGAC  | <i>rsmZ</i> deletion |
| EcoRI- <i>ahpB</i> -up-F     | GGAATTCGCTGATAGGCACGCTGACC        | <i>ahpB</i> deletion |
| BamHI- <i>ahpB</i> -up-R     | CGGGATCCCCAGAAGAACAGCACGACGTA     | <i>ahpB</i> deletion |
| BamHI- <i>ahpB</i> -down-F   | CGGGATCCGCCGAGGCACTGTGATCC        | <i>ahpB</i> deletion |
| HindIII- <i>ahpB</i> -down-R | CCCAAGCTTCAGAGCGAATCGAGATAGCG     | <i>ahpB</i> deletion |
| KpnI- <i>katB</i> -up-F      | GGGGTACCGGGTTCACTCCCTGTATTTTCG    | <i>katB</i> deletion |
| BamHI- <i>katB</i> -up-R     | CGGGATCCGAAGACCTTGGCCATGCTC       | <i>katB</i> deletion |
| BamHI- <i>katB</i> -down-F   | CGGGATCCTCTACAAGGCTGACAGCGAC      | <i>katB</i> deletion |
| HindIII- <i>katB</i> -down-R | CCCAAGCTTGTCGTCAATGAATCAATGGC     | <i>katB</i> deletion |
| EcoRI- <i>aceF</i> -F        | CGGAATTCAGCGGTGGTGGCACGTAA        | <i>aceF</i> cloning  |
| BamHI- <i>aceF</i> -R        | CGGGATCCGGTATGACGGGACGCAGTTT      | <i>aceF</i> cloning  |
| <i>rpsL</i> -F               | CAAGCGCATGGTCGACAAGAG             | RT-qPCR              |
| <i>rpsL</i> -R               | ACCTTACGCAGTGCCGAGTTC             | RT-qPCR              |
| <i>exsA</i> -F               | CACGTCGGATAATCCTGATT              | RT-qPCR              |
| <i>exsA</i> -R               | TAGCGGAGAGGCATGAATA               | RT-qPCR              |
| <i>exsC</i> -F               | ATGGATTTAACGAGCAAGGTCAA           | RT-qPCR              |
| <i>exsC</i> -R               | GAGGGACAGGGAAGGCAAA               | RT-qPCR              |
| <i>pcrV</i> -F               | CACGCTCTATGGCTATGC                | RT-qPCR              |
| <i>pcrV</i> -R               | AAGGTATCCAGATTGCTCAG              | RT-qPCR              |
| <i>exoU</i> -F               | TCCGGCGGAAATCAATC                 | RT-qPCR              |
| <i>exoU</i> -R               | CTTAGCCATCTCAACGGTAGTC            | RT-qPCR              |
| <i>rsmY</i> -F               | CAAAGACAATACGGAAACTCAG            | RT-qPCR              |
| <i>rsmY</i> -R               | GGGGTTTTGCAGACCTCTA               | RT-qPCR              |
| <i>rsmZ</i> -F               | TACAGGGAACACGCAACC                | RT-qPCR              |
| <i>rsmZ</i> -R               | TCCTGATGAATCGCCTCC                | RT-qPCR              |
| <i>gacA</i> -F               | CCTGATGATCGCCAACTG                | RT-qPCR              |
| <i>gacA</i> -R               | ATAGGTATTACGGTCTTCG               | RT-qPCR              |
| <i>gacS</i> -F               | GAGGAAATGCAGCACAAC                | RT-qPCR              |
| <i>gacS</i> -R               | GTTCTGGATCTCGATGGT                | RT-qPCR              |
| <i>oxyR</i> -F               | GCTGCTCAACGACAAGA                 | RT-qPCR              |
| <i>oxyR</i> -R               | ATGTGGCGGATGGTCTC                 | RT-qPCR              |
| <i>katA</i> -F               | AAGAGCTATCGGCACATC                | RT-qPCR              |
| <i>katA</i> -R               | TGGAACCTTGACCCAGAAG               | RT-qPCR              |
| <i>katB</i> -F               | TACAGCCACATGACCAAT                | RT-qPCR              |
| <i>katB</i> -R               | CTTGAGCACCTGGATGTA                | RT-qPCR              |
| <i>ahpB</i> -F               | CGTCGTGCTGTTCTTCTG                | RT-qPCR              |
| <i>ahpB</i> -R               | TTATCCATGCGGTTGTTGT               | RT-qPCR              |

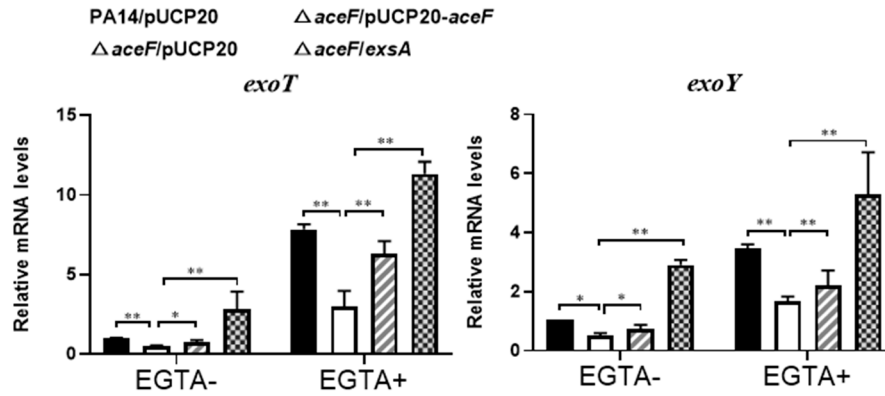

**Figure S1. Expression levels of *exoT* and *exoY*.** Wild-type PA14, the  $\Delta aceF$  mutant, the complemented strain and the *exsA*-over-expression  $\Delta aceF$  mutant were grown in LB with or without 5 mM EGTA for 4 h. The relative mRNA levels of the T3SS genes were determined by real-time PCR. The 30S ribosomal protein gene *rpsL* and *PA1805* were used as an internal control. Data represent the mean  $\pm$  standard error of mean of the results from three samples. \*, P < 0.05; \*\*, P < 0.01 by ANOVA.

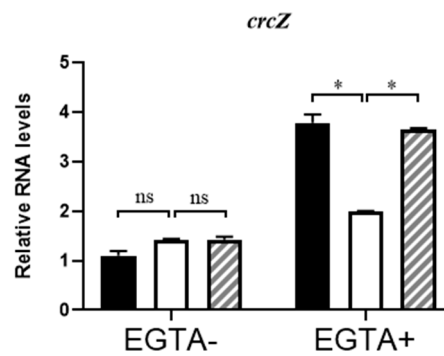

**Figure S2. Expression levels of *crcZ*.** Wild-type PA14, the  $\Delta aceF$  mutant and the complemented strain were grown in LB with or without 5 mM EGTA to an OD<sub>600</sub> of 1. The relative levels of *crcZ* were determined by real-time PCR. Data represent the mean  $\pm$  standard error of mean of the results from three samples. ns, not significant; \*, P < 0.05 by ANOVA.
